# Supplementary figures and images for: Nutritional Composition and Bioactive Properties of Four Duckweed Varieties in Sri Lanka
Source: Research Square preprint supplement (doi:10.21203/rs.3.rs-6819490/v1), 2025-07-15

**Graphical Abstract**


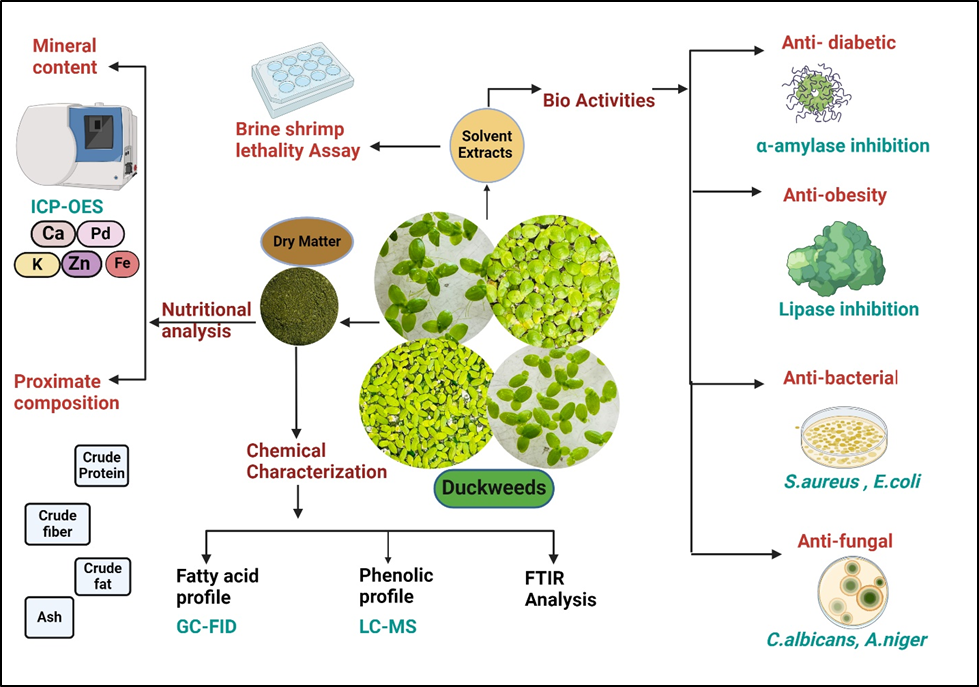

Supplement: Supplementary file 1 [file 9240fc93da743a77054aeb6c.docx]
